# Supplementary material for: TheC. elegansVAPB homolog VPR-1 is a permissive signal for gonad development
Source: Oxford University Press journal article supplement (doi:10.1242/dev.152207), 2017-06-15
Supplement: dev152207supp.pdf [file dev152207supp.pdf]

## SUPPLEMENTARY INFORMATION

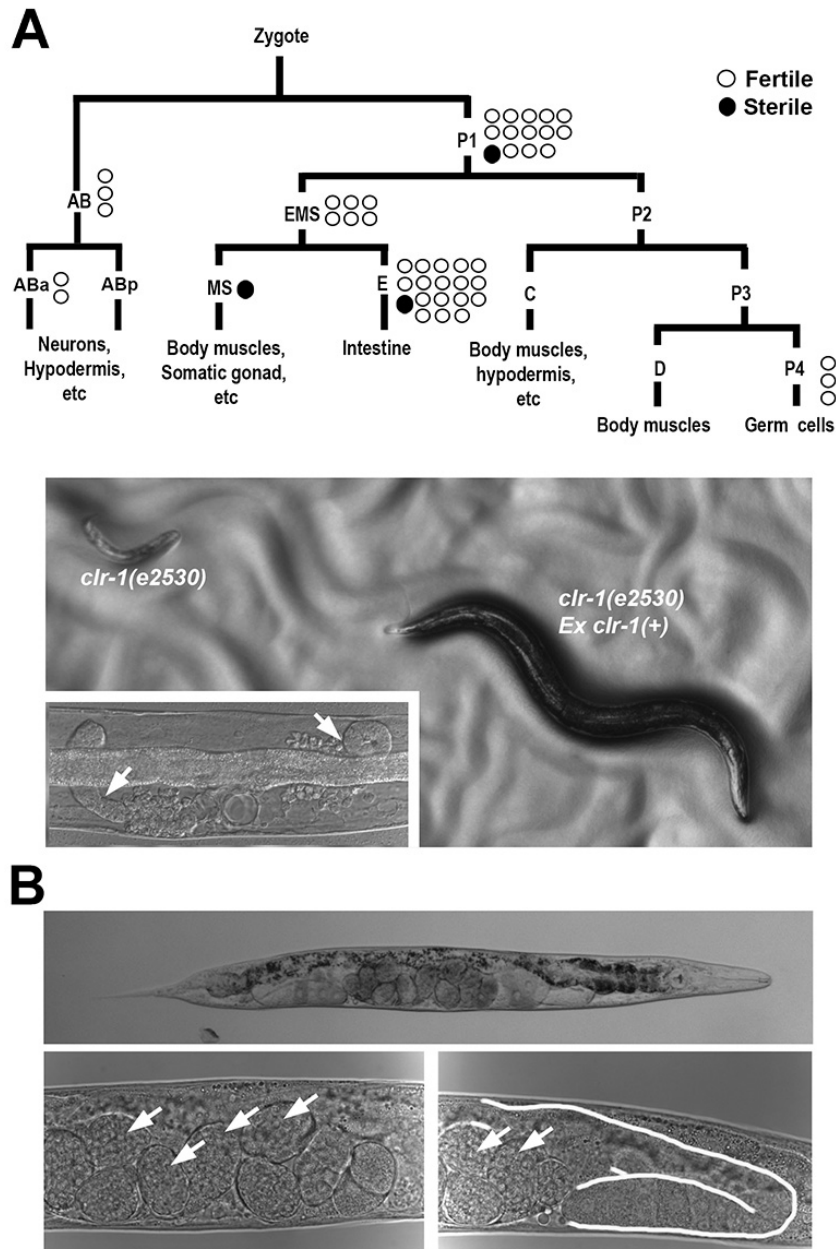

**Figure S1. CLR-1 expression in the hypodermis promotes survival and prevents germ cell degeneration.** (A) Genetic mosaic analysis showing cell lineages of major tissues. Each circle indicates one genetic mosaic worm. Points at which the genomic copy of *clr-1(+)* was lost and the resulting phenotype are indicated. Below are representative DIC images of *clr-1(e2530)* mosaic worms with and without *clr-1* expression. *Ex clr-1(+)* indicates expression of the *clr-1* genomic locus via an extrachromosomal array. Inset shows a close-up image of a *clr-1* mutant degenerating gonad (arrows). The hypodermis is syncytial and derived from multiple lineages. Thus, hypodermal *clr-1* loss occurs only when the *Ex clr-1(+)* transgene is lost from both AB and P1. Note that *clr-1* loss from the germ line (P4) or somatic gonad lineages (EMS) does not cause gonad

degeneration or other obvious defects. (B) Driving *clr-1* expression in the hypodermis using the *dpy-7* promoter is sufficient to partially rescue the *clr-1(e1745)* fluid accumulation and gonad defects. Gonad is outlined in white. Arrows indicate fertilized eggs.

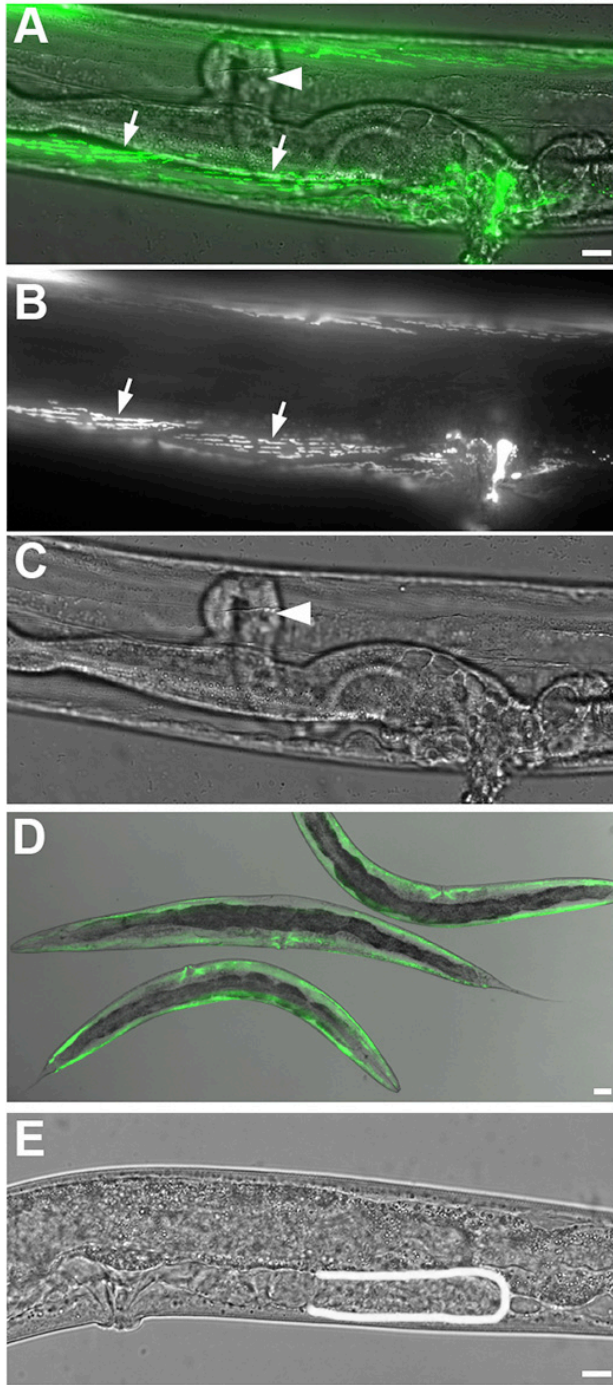

**Figure S2. Effects of *clr-1* or *vab-1* MSPd receptor loss on *vpr-1* mutant phenotypes.** (A-D) CLR-1 receptor loss suppresses the *vpr-1(tm1411)* body wall muscle

mitochondrial localization defect, but not the gonadogenesis defect. Merged DIC and GFP (A), GFP only (B), and DIC only (C) images of a *vpr-1 M- Z-* mutant exposed to *clr-1* RNAi throughout larval development. The *myo-3p::mitoGFP* transgene was used to visualize body wall muscle mitochondria. Arrows indicate muscle mitochondrial networks showing linear arrays seen in the wild type (not shown), but not in *vpr-1 M- Z-* mutants expressing *clr-1*. See Han et al. (2012 and 2013) for muscle phenotypes. Arrowhead indicates an arrested *vpr-1 M- Z-* gonad. (D) *vpr-1(tm1411); clr-1(e1745)* transgenic mutants expressing the *rol-6p::clr-1* and *myo-3p::mitoGFP* transgenes. A merged DIC and GFP image is shown. Worms were grown at 25°C. Notice that the early larval lethality defect (Figure S1A) is suppressed by the *rol-6p::clr-1* transgene, but the worms are still sterile. (E) VAB-1 MSPd receptor loss does not suppress the *vpr-1(tm1411)* gonad defect. DIC image of a *vpr-1(tm1411); vab-1(dx31)* hermaphrodite showing arrested gonadogenesis (E) that is similar to *vpr-1(tm1411)* single mutants (Figure 1). Gonad is outlined in white. Bars, 10  $\mu\text{m}$ .

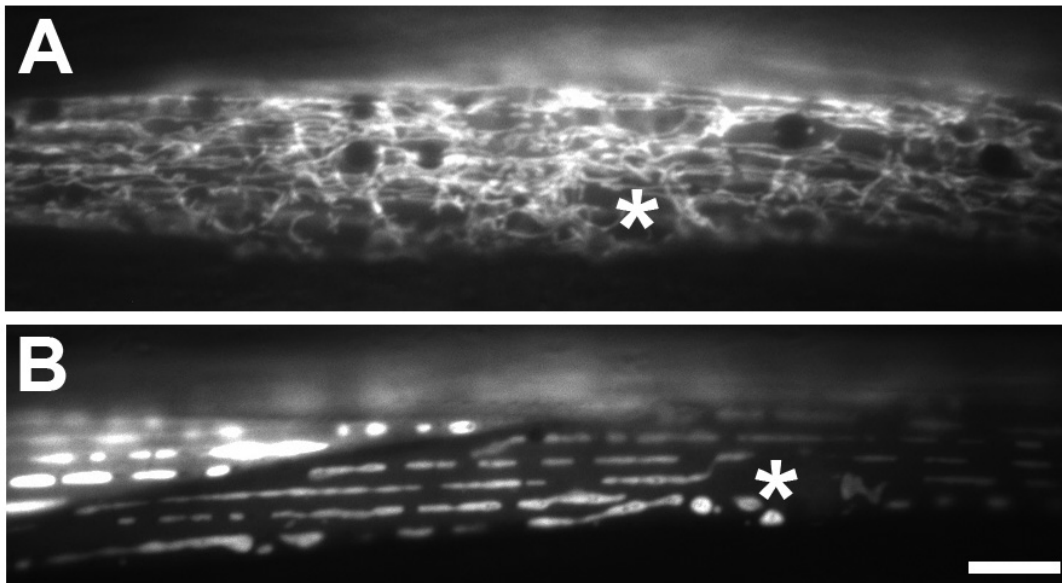

**Figure S3. Neuronal *vpr-1* expression using the Q system is sufficient to rescue the *vpr-1(tm1411)* body wall muscle mitochondrial defect.** *vpr-1* expression was driven in head interneurons under the *glr-5* promoter. The *myo-3p::mitoGFP* transgene was used to visualize body wall muscle mitochondria. (A, B) GFP images of transgenic *vpr-1* mutant muscles grown in the absence (A) and presence of QA (B), which induces *vpr-1* expression. Asterisks indicate muscle nuclei. Wild-type controls (not shown) are similar to mitochondrial arrays observed in panel B (Han et al., 2012 and 2013). Bar, 10  $\mu\text{m}$ .
